# Supplementary material for: Bioretention Systems Optimization and Design Characterization Model Using Fuzzy Rough Set Theory
Source: MDPI journal article supplement (doi:10.3390/w14132037), 2022-06-25
Supplement: s1 [file s1]

**Table S1.** EBF IN Fuzzified Values Rules Optimization.

| No.                | RULE                                                                   | Rainfall Fuzzy Value         | EMC Parameters                                   | Percentile Occurrence Frequency |
|--------------------|------------------------------------------------------------------------|------------------------------|--------------------------------------------------|---------------------------------|
| 1                  | (FTOC = 19) => (EBF_IN = 11)                                           | EBF_IN = 11                  | FTOC = 19                                        | 20                              |
| 2                  | (FTCu = 13) & (FTPb = 13) => (EBF_IN = 12);                            | EBF_IN = 12                  | FTCu = 13, FTPb = 13                             | 30                              |
| 3                  | (FTSS = 16) & (FTN = 17) => (EBF_IN = 12)                              | EBF_IN = 12                  | FTSS = 16, FTN = 17                              | 30                              |
| 4                  | (FTurbidity = 24) => (EBF_IN = 12)                                     | EBF_IN = 12                  | FTurbidity = 24                                  | 30                              |
| 5                  | (FTSS = 17) & (FCd = 16) => (EBF_IN = 13)                              | EBF_IN = 13                  | FTSS = 17, FCd = 16                              | 40                              |
| 6                  | (FTurbidity = 21) => (EBF_IN = 13)                                     | EBF_IN = 13                  | FTurbidity = 21                                  | 40                              |
| 7                  | (FCr = 3) => (EBF_IN = 13)                                             | EBF_IN = 13                  | FCr = 3                                          | 40                              |
| 8                  | (FPb = 13) => (EBF_IN = 13)                                            | EBF_IN = 13                  | FPb = 13                                         | 40                              |
| 9                  | (FConductivity = 13) & (FCOD <sub>Cr</sub> = 13) => (EBF_IN = 14)      | EBF_IN = 14                  | FConductivity = 13, FCOD <sub>Cr</sub> = 13      | 50                              |
| 10                 | (FTSS = 17) & (FTN = 15) => (EBF_IN = 14)                              | EBF_IN = 14                  | FTSS = 17, FTN = 15                              | 50                              |
| 11                 | (FNO <sub>2</sub> = 11) & (FCu = 14) => (EBF_IN = 14)                  | EBF_IN = 14                  | FNO <sub>2</sub> = 11, FCu = 14                  | 50                              |
| 12                 | (FNO <sub>4</sub> = 0) & (FTFe = 12) => (EBF_IN = 14)                  | EBF_IN = 14                  | FNO <sub>4</sub> = 0, FTFe = 12                  | 50                              |
| 13                 | (FNO <sub>2</sub> = 15) => (EBF_IN = 14)                               | EBF_IN = 14                  | FNO <sub>2</sub> = 15                            | 50                              |
| 14                 | (FTP = 15) & (FO&G = 17) => (EBF_IN = 14)                              | EBF_IN = 14                  | FTP = 15, FO&G = 17                              | 50                              |
| 15                 | (FNI = 11) & (FTCu = 10) => (EBF_IN = 15)                              | EBF_IN = 15                  | FNI = 11, FTCu = 10                              | 60                              |
| 16                 | (FBOD <sub>5</sub> = 11) & (FTP = 11) => (EBF_IN = 15)                 | EBF_IN = 15                  | FBOD <sub>5</sub> = 11, FTP = 11                 | 60                              |
| 17                 | (FPO <sub>4</sub> -P = 15) & (FTFe = 12) => (EBF_IN = 15)              | EBF_IN = 15                  | FPO <sub>4</sub> -P = 15, FTFe = 12              | 60                              |
| 18                 | (FNO <sub>2</sub> = 17) => (EBF_IN = 15)                               | EBF_IN = 15                  | FNO <sub>2</sub> = 17                            | 60                              |
| 19                 | (FTKN = 10) & (FTZn = 16) => (EBF_IN = 15)                             | EBF_IN = 15                  | FTKN = 10, FTZn = 16                             | 60                              |
| 20                 | (FTFe = 15) & (FTCd = 10) => (EBF_IN = 16)                             | EBF_IN = 16                  | FTFe = 15, FTCd = 10                             | 70                              |
| 21                 | (FpH = 14) & (FTPb = 14) => (EBF_IN = 16)                              | EBF_IN = 16                  | FpH = 14, FTPb = 14                              | 70                              |
| 22                 | (FTFe = 3) => (EBF_IN = 17)                                            | EBF_IN = 17                  | FTFe = 3                                         | 80                              |
| 23                 | (FCOD <sub>Mn</sub> = 11) & (FPO <sub>4</sub> -P = 0) => (EBF_IN = 18) | EBF_IN = 18                  | FCOD <sub>Mn</sub> = 11, FPO <sub>4</sub> -P = 0 | 90                              |
| 24                 | (FTurbidity = 16) & (FTCr = 16) => (EBF_IN = 18)                       | EBF_IN = 18                  | FTurbidity = 16, FTCr = 16                       | 90                              |
| 25                 | (FBOD <sub>5</sub> = 5) => (EBF_IN = 26)                               | EBF_IN = 26                  | FBOD <sub>5</sub> = 5                            | 98                              |
| 26                 |                                                                        |                              |                                                  |                                 |
| Approximation Rule | (FTFe = 0) => (EBF_IN = 1) OR (EBF_IN = 13)                            | EBF_IN = 1) OR (EBF_IN = 13) | FTFe = 0                                         | 1 OR 40                         |

**Table S2.** GEF1 IN Fuzzified Values Rules Optimization.

| No. | RULE                                   | Rainfall Fuzzy Value | EMC Parameters     | Percentile Occurrence Frequency |
|-----|----------------------------------------|----------------------|--------------------|---------------------------------|
| 1   | (FpH = 11) => (GEF1_IN = 11)           | GEF1_IN = 11         | FpH = 11           | 20                              |
| 2   | (FTurbidity = 1) => (GEF1_IN = 12)     | GEF1_IN = 12         | FTurbidity = 1     | 30                              |
| 3   | (FConductivity = 21) => (GEF1_IN = 13) | GEF1_IN = 13         | FConductivity = 21 | 40                              |
| 4   | (FTOC = 2) => (GEF1_IN = 14)           | GEF1_IN = 14         | FTOC = 2           | 50                              |
| 5   | (FpH = 21) => (GEF1_IN = 14)           | GEF1_IN = 14         | FpH = 21           | 50                              |
| 6   | (FTSS = 13) => (GEF1_IN = 15)          | GEF1_IN = 15         | FTSS = 13          | 60                              |

|                    |                                                         |                              |                   |          |
|--------------------|---------------------------------------------------------|------------------------------|-------------------|----------|
| 7                  | (FTSS = 8) => (GEF1_IN = 16)                            | GEF1_IN = 16                 | FTSS = 8          | 70       |
| 8                  | (FpH = 9) => (GEF1_IN = 17)                             | Rainfall_GEF1_IN = 17        | FpH = 9           | 80       |
| 9                  | (FpH = 6) => (GEF1_IN = 17)                             | GEF1_IN = 17                 | FpH = 6           | 80       |
| 10                 | (FpH = 8) => (GEF1_IN = 18)                             | GEF1_IN = 18                 | FpH = 8           | 90       |
| 11                 |                                                         |                              |                   |          |
| Approximation Rule | (FConductivity = 0) => (GEF1_IN = 16) OR (GEF1_IN = 18) | GEF1_IN = 16 OR GEF1_IN = 18 | FConductivity = 0 | 70 OR 90 |

**Table S3.** GEF2 IN Fuzzified Values Rules Optimization.

| No. | RULE                                                                  | Rainfall Fuzzy Value | EMC Parameters                              | Percentile Occurrence Frequency |
|-----|-----------------------------------------------------------------------|----------------------|---------------------------------------------|---------------------------------|
| 1   | (FO&G = 0) & (FTNi = 0) => (GEF2_IN = 1)                              | GEF2_IN = 1          | FO&G = 0, FTKNi = 0                         | 1                               |
| 2   | (FConductivity = 25) => (GEF2_IN = 11)                                | GEF2_IN = 11         | FConductivity = 25                          | 20                              |
| 3   | (FFe = 3) => (GEF2_IN = 11)                                           | GEF2_IN = 11         | FFe = 3                                     | 20                              |
| 4   | (FpH = 17) => (GEF2_IN = 12)                                          | GEF2_IN = 12         | FpH = 17                                    | 30                              |
| 5   | (FTSS = 17) => (GEF2_IN = 12)                                         | GEF2_IN = 12         | FTSS = 17                                   | 30                              |
| 6   | (FCr = 10) => (GEF2_IN = 13)                                          | GEF2_IN = 13         | FCr = 10                                    | 40                              |
| 7   | (FPb = 16) => (GEF2_IN = 13)                                          | GEF2_IN = 13         | FPb = 16                                    | 40                              |
| 8   | (FTP = 12) & (FCr = 13) => (GEF2_IN = 13)                             | GEF2_IN = 13         | FTP = 12, FCr = 13                          | 40                              |
| 9   | (FCOD <sub>Cr</sub> = 14) & (FTKN = 0) & (FFe = 11) => (GEF2_IN = 13) | GEF2_IN = 13         | FCOD <sub>Cr</sub> = 14, FTKN = 0, FFe = 11 | 40                              |
| 10  | (FTSS = 3) => (GEF2_IN = 14)                                          | GEF2_IN = 14         | FTSS = 3                                    | 50                              |
| 11  | (FTSS = 18) => (GEF2_IN = 14)                                         | GEF2_IN = 14         | FTSS = 18                                   | 50                              |
| 12  | (FConductivity = 26) => (GEF2_IN = 14)                                | GEF2_IN = 14         | FConductivity = 26                          | 50                              |
| 13  | (FO&G = 11) & (FTNi = 12) => (GEF2_IN = 15)                           | GEF2_IN = 15         | FO&G = 11, FTKNi = 12                       | 60                              |
| 14  | (FTKN = 0) & (FZn = 10) & (FTAs = 0) => (GEF2_IN = 16)                | GEF2_IN = 16         | FTKN = 0, FZn = 10, FTAs = 0                | 70                              |
| 15  | (FTFe = 13) & (FTZn = 12) => (GEF2_IN = 16)                           | GEF2_IN = 16         | FTFe = 13, FTZn = 12                        | 70                              |
| 16  | (FpH = 10) & (FTFe = 10) => (GEF2_IN = 17)                            | GEF2_IN = 17         | FpH = 10, FTFe = 10                         | 80                              |
| 17  | (FTOC = 0) & (FTZn = 16) => (GEF2_IN = 17)                            | GEF2_IN = 17         | FTOC = 0, FTZn = 16                         | 80                              |
| 18  | (FBOD <sub>5</sub> = 2) => (GEF2_IN = 17)                             | GEF2_IN = 17         | FBOD <sub>5</sub> = 2                       | 80                              |
| 19  | (FTOC = 9) => (GEF2_IN = 18)                                          | GEF2_IN = 18         | FTOC = 9                                    | 90                              |

**Table S4.** SCW1 IN Fuzzified Values Rules Optimization.

| No. | RULE                                        | Rainfall Fuzzy Value | EMC Parameters          | Percentile Occurrence Frequency |
|-----|---------------------------------------------|----------------------|-------------------------|---------------------------------|
| 1   | (FpH = 0) => (SCW1_IN = 1)                  | SCW1_IN = 1          | FpH = 0                 | 1                               |
| 2   | (FCOD <sub>Cr</sub> = 12) => (SCW1_IN = 12) | SCW1_IN = 12         | FCOD <sub>Cr</sub> = 12 | 30                              |
| 3   | (FConductivity = 15) => (SCW1_IN = 12)      | SCW1_IN = 12         | FConductivity = 15      | 30                              |
| 4   | (FCr = 17) => (SCW1_IN = 12)                | SCW1_IN = 12         | FCr = 17                | 30                              |
| 5   | (FTZn = 13) => (SCW1_IN = 12)               | SCW1_IN = 12         | FTZn = 13               | 30                              |
| 6   | (FCu = 12) & (FZn = 13) => (SCW1_IN = 13)   | SCW1_IN = 13         | FCu = 12, FZn = 13      | 40                              |
| 7   | (FTN = 10) & (FCr = 16) => (SCW1_IN = 14)   | SCW1_IN = 14         | FTN = 10, FCr = 16      | 50                              |

|    |                                                                        |              |                                                    |    |
|----|------------------------------------------------------------------------|--------------|----------------------------------------------------|----|
| 8  | (FBOD <sub>5</sub> = 0) & (FCr = 14) => (SCW1_IN = 14)                 | SCW1_IN = 14 | FBOD <sub>5</sub> = 0, FCr = 14                    | 50 |
| 9  | (FTN = 7) => (SCW1_IN = 14)                                            | SCW1_IN = 14 | FTN = 7                                            | 50 |
| 10 | (FTN = 16) => (SCW1_IN = 14)                                           | SCW1_IN = 14 | FTN = 16                                           | 50 |
| 11 | (FTPb = 5) => (SCW1_IN = 14)                                           | SCW1_IN = 14 | FTPb = 5                                           | 50 |
| 12 | (FNO <sub>2</sub> = 5) => (SCW1_IN = 15)                               | SCW1_IN = 15 | FNO <sub>2</sub> = 5                               | 60 |
| 13 | (FConductivity = 13) & (FCOD <sub>Cr</sub> = 14) =><br>(SCW1_IN = 15)  | SCW1_IN = 15 | FConductivity = 13,<br>FCOD <sub>Cr</sub> = 14     | 60 |
| 14 | (FpH = 11) & (FTSS = 11) & (FTP = 10) =><br>(SCW1_IN = 16)             | SCW1_IN = 16 | FpH = 11, FTSS = 11,<br>FTP = 10                   | 70 |
| 15 | (FTP = 12) & (FTZn = 15) => (SCW1_IN = 16)                             | SCW1_IN = 16 | FTP = 12, FTZn = 15                                | 70 |
| 16 | (FPb = 12) & (FTCr = 11) => (SCW1_IN = 17)                             | SCW1_IN = 17 | FPb = 12, FTCr = 11                                | 80 |
| 17 | (FCOD <sub>Mn</sub> = 1) & (FPO <sub>4</sub> -P = 0) => (SCW1_IN = 18) | SCW1_IN = 18 | FCOD <sub>Mn</sub> = 1, FPO <sub>4</sub> -P<br>= 0 | 90 |

**Table S5.** SCW2 IN Fuzzified Values Rules Optimization.

| No. | RULE                                        | Rainfall Fuzzy Value | EMC Parameters          | Percentile Occurrence Frequency |
|-----|---------------------------------------------|----------------------|-------------------------|---------------------------------|
| 1   | (FTNi = 0) => (SCW2_IN = 1)                 | SCW2_IN = 1          | FTNi = 0                | 1                               |
| 2   | (FBOD <sub>5</sub> = 20) => (SCW2_IN = 1)   | SCW2_IN = 1          | FBOD <sub>5</sub> = 20  | 1                               |
| 3   | (FTOC = 11) => (SCW2_IN = 11)               | SCW2_IN = 11         | FTOC = 11               | 20                              |
| 4   | (FpH = 12) & (FTZn = 10) => (SCW2_IN = 12)  | SCW2_IN = 12         | FpH = 12, FTZn = 10     | 30                              |
| 5   | (FpH = 21) => (SCW2_IN = 12)                | SCW2_IN = 12         | FpH = 21                | 30                              |
| 6   | (FTOC = 6) => (SCW2_IN = 12)                | SCW2_IN = 12         | FTOC = 6                | 30                              |
| 7   | (FO&G = 13) => (SCW2_IN = 13)               | SCW2_IN = 13         | FO&G = 13               | 40                              |
| 8   | (FCr = 12) => (SCW2_IN = 13)                | SCW2_IN = 13         | FCr = 12                | 40                              |
| 9   | (FCOD <sub>Cr</sub> = 16) => (SCW2_IN = 14) | SCW2_IN = 14         | FCOD <sub>Cr</sub> = 16 | 50                              |
| 10  | (FTSS = 3) => (SCW2_IN = 14)                | SCW2_IN = 14         | FTSS = 3                | 50                              |
| 11  | (FTSS = 13) & (FTN = 12) => (SCW2_IN = 14)  | SCW2_IN = 14         | FTSS = 13, FTN = 12     | 50                              |
| 12  | (FTSS = 15) => (SCW2_IN = 15)               | SCW2_IN = 15         | FTSS = 15               | 60                              |
| 13  | (FTPb = 15) => (SCW2_IN = 15)               | SCW2_IN = 15         | FTPb = 15               | 60                              |
| 14  | (FBOD <sub>5</sub> = 18) => (SCW2_IN = 16)  | SCW2_IN = 16         | FBOD <sub>5</sub> = 18  | 70                              |
| 15  | (FpH = 7) => (SCW2_IN = 17)                 | SCW2_IN = 17         | FpH = 7                 | 80                              |
| 16  | (FTOC = 1) => (SCW2_IN = 18)                | SCW2_IN = 18         | FTOC = 1                | 90                              |

**Table S6.** EBF OUT Fuzzified Values Rules Optimization.

| No. | RULE                                                    | Rainfall Fuzzy Value | EMC Parameters                 | Percentile Occurrence Frequency |
|-----|---------------------------------------------------------|----------------------|--------------------------------|---------------------------------|
| 1   | (FZn = 12) & (FTAs = 0) =>(EBF_OUT = 12)                | EBF_OUT = 12         | FZn=12, FTAs=0                 | 30                              |
| 2   | (FpH = 19) =>(EBF_OUT = 12)                             | EBF_OUT = 12         | FpH=19                         | 30                              |
| 3   | (FpH = 16) =>(EBF_OUT = 13)                             | EBF_OUT = 13         | FpH=16                         | 40                              |
| 4   | (FBOD <sub>5</sub> = 13) & (FTKN = 12) =>(EBF_OUT = 13) | EBF_OUT = 13         | FBOD <sub>5</sub> =13, FTKN=12 | 40                              |
| 5   | (FTSS = 14) & (FNI = 15) =>(EBF_OUT = 14)               | EBF_OUT = 14         | FTSS=14, FNI=15                | 50                              |
| 6   | (FNI = 13) =>(EBF_OUT = 14)                             | EBF_OUT = 14         | FNI=13                         | 50                              |
| 7   | (FTP = 15) =>(EBF_OUT = 14)                             | EBF_OUT = 14         | FTP=15                         | 50                              |

|    |                                                                                                                                         |                                                                                                                               |                                |                                             |
|----|-----------------------------------------------------------------------------------------------------------------------------------------|-------------------------------------------------------------------------------------------------------------------------------|--------------------------------|---------------------------------------------|
| 8  | (FTN = 11) & (FTNi = 15) =>(EBF_OUT = 14)                                                                                               | EBF_OUT = 14                                                                                                                  | FTN=11, FTNi=15                | 50                                          |
| 9  | (FNO <sub>2</sub> = 10) =>(EBF_OUT = 14)                                                                                                | EBF_OUT = 14                                                                                                                  | FNO <sub>2</sub> =10           | 50                                          |
| 10 | (FCOD <sub>Cr</sub> = 14) & (FTP = 11) =>(EBF_OUT = 15)                                                                                 | EBF_OUT = 15                                                                                                                  | FCOD <sub>Cr</sub> =14, FTP=11 | 60                                          |
| 11 | (FTurbidity = 13) & (FTNi = 12) =>(EBF_OUT = 15)                                                                                        | EBF_OUT = 15                                                                                                                  | FTurbidity=13, FTNi=12         | 60                                          |
| 12 | (FConductivity = 21) =>(EBF_OUT = 15)                                                                                                   | (EBF_OUT = 15);                                                                                                               | FConductivity=21               | 60                                          |
| 13 | (FTurbidity = 5) =>(EBF_OUT = 15)                                                                                                       | EBF_OUT = 15                                                                                                                  | FTurbidity=5                   | 60                                          |
| 14 | (FCOD <sub>Cr</sub> = 10) & (FNi = 12) =>(EBF_OUT = 16)                                                                                 | EBF_OUT = 16                                                                                                                  | FCOD <sub>Cr</sub> =10, FNi=12 | 70                                          |
| 15 | (FTSS = 17) & (FTFe = 15) =>(EBF_OUT = 16)                                                                                              | EBF_OUT = 16                                                                                                                  | FTSS=17, FTFe=15               | 70                                          |
| 16 | (FTOC = 10) =>(EBF_OUT = 17)                                                                                                            | EBF_OUT = 17                                                                                                                  | FTOC=10                        | 80                                          |
| 17 | (FNi = 17) & (FTCr = 15) =>(EBF_OUT = 18)                                                                                               | (EBF_OUT = 18);                                                                                                               | FNi=17, FTCr=15                | 90                                          |
| 18 | (FNH <sub>4</sub> = 19) =>(EBF_OUT = 18)                                                                                                | EBF_OUT = 18                                                                                                                  | FNH <sub>4</sub> =19           | 90                                          |
| 19 | (FConductivity = 6) =>(EBF_OUT = 26)                                                                                                    | EBF_OUT = 26                                                                                                                  | FConductivity=6                | 98                                          |
| 20 | (FTSS = 0) => (EBF_OUT = 1) OR (EBF_OUT = 11) OR (EBF_OUT = 12) OR (EBF_OUT = 13) OR (EBF_OUT = 14) OR (EBF_OUT = 15) OR (EBF_OUT = 17) | EBF_OUT = 1 OR<br>EBF_OUT = 11 OR<br>EBF_OUT = 12 OR<br>EBF_OUT = 13 OR<br>EBF_OUT = 14 OR<br>EBF_OUT = 15 OR<br>EBF_OUT = 17 | FTSS=0                         | 1 OR 20 OR 30<br>OR 40 OR 50 OR<br>60 OR 80 |

**Table S7.** GEF2 OUT Fuzzified Values Rules Optimization.

| No. | RULE                                                                                                                              | Rainfall Fuzzy Value                                                                                             | EMC Parameters               | Percentile Occurrence Frequency       |
|-----|-----------------------------------------------------------------------------------------------------------------------------------|------------------------------------------------------------------------------------------------------------------|------------------------------|---------------------------------------|
| 1   | (FTN = 9) => (GEF2_OUT = 11)                                                                                                      | GEF2_OUT = 11                                                                                                    | FTN = 9                      | 20                                    |
| 2   | (FTCr = 13) => (GEF2_OUT = 13)                                                                                                    | GEF2_OUT = 13                                                                                                    | FTCr = 13                    | 30                                    |
| 3   | (FBOD <sub>5</sub> = 12) => (GEF2_OUT = 13)                                                                                       | GEF2_OUT = 13                                                                                                    | FBOD <sub>5</sub> = 12       | 30                                    |
| 4   | (FTSS = 16) => (GEF2_OUT = 14)                                                                                                    | GEF2_OUT = 14                                                                                                    | FTSS = 16                    | 40                                    |
| 5   | (FTSS = 4) => (GEF2_OUT = 14)                                                                                                     | GEF2_OUT = 14                                                                                                    | FTSS = 4                     | 40                                    |
| 6   | (FpH = 12) => (GEF2_OUT = 15)                                                                                                     | GEF2_OUT = 15                                                                                                    | FpH = 12                     | 50                                    |
| 7   | (FTSS = 15) => (GEF2_OUT = 16)                                                                                                    | GEF2_OUT = 16                                                                                                    | FTSS = 15                    | 60                                    |
| 8   | (FPb = 10) => (GEF2_OUT = 16)                                                                                                     | GEF2_OUT = 16                                                                                                    | FPb = 10                     | 60                                    |
| 9   | (FTN = 5) => (GEF2_OUT = 17)                                                                                                      | GEF2_OUT = 17                                                                                                    | FTN = 5                      | 70                                    |
| 10  | (FConductivity = 10) & (FTKN = 0) =>(GEF2_OUT = 17)                                                                               | GEF2_OUT = 17                                                                                                    | FConductivity = 10, FTKN = 0 | 70                                    |
| 11  | (FTurbidity = 17) => (GEF2_OUT = 17)                                                                                              | GEF2_OUT = 17                                                                                                    | FTurbidity = 17              | 70                                    |
| 12  | (FpH = 21) => (GEF2_OUT = 18)                                                                                                     | GEF2_OUT = 18                                                                                                    | FpH = 21                     | 80                                    |
| 13  | (FTurbidity = 0) => (GEF2_OUT = 1) OR (GEF2_OUT = 11) OR (GEF2_OUT = 12) OR (GEF2_OUT = 13) OR (GEF2_OUT = 14) OR (GEF2_OUT = 15) | GEF2_OUT = 1 OR<br>GEF2_OUT = 11 OR<br>GEF2_OUT = 12 OR<br>GEF2_OUT = 13 OR<br>GEF2_OUT = 14 OR<br>GEF2_OUT = 15 | FTurbidity=0                 | 1 OR 20 OR 30<br>OR 40 OR 50 OR<br>60 |

**Table S8.** SCW1 OUT Fuzzified Values Rules Optimization.

| No. | RULE                                                  | Rainfall Fuzzy Value            | EMC Parameters                | Percentile Occurrence Frequency |
|-----|-------------------------------------------------------|---------------------------------|-------------------------------|---------------------------------|
| 1   | (FTN = 11) => (SCW1_OUT = 12)                         | SCW1_OUT = 12                   | FTN = 11                      | 30                              |
| 2   | (FTCr = 12) & (TCu = 13) => (SCW1_OUT = 12)           | SCW1_OUT = 12                   | FTCr = 12, FTCu = 13          | 30                              |
| 3   | (FTN = 13) => (SCW1_OUT = 12)                         | SCW1_OUT = 12                   | FTN = 13                      | 30                              |
| 4   | (FpH = 19) => (SCW1_OUT = 13)                         | SCW1_OUT = 13                   | FpH = 19                      | 40                              |
| 5   | (FConductivity = 16) => (SCW1_OUT = 13)               | SCW1_OUT = 13                   | FConductivity = 16            | 40                              |
| 6   | (FTurbidity = 13) => (SCW1_OUT = 14)                  | SCW1_OUT = 14                   | FTurbidity = 13               | 50                              |
| 7   | (FCu = 13) => (SCW1_OUT = 14)                         | SCW1_OUT = 14                   | FCu = 13                      | 50                              |
| 8   | (FTCr = 14) => (SCW1_OUT = 14)                        | SCW1_OUT = 14                   | FTCr = 14                     | 50                              |
| 9   | (FCOD <sub>Cr</sub> = 2) => (SCW1_OUT = 14)           | SCW1_OUT = 14                   | FCOD <sub>Cr</sub> = 2        | 50                              |
| 10  | (FTurbidity = 12) & (FTFe = 13) => (SCW1_OUT = 15)    | SCW1_OUT = 15                   | FTurbidity = 12, FTFe = 13    | 60                              |
| 11  | (FTSS = 11) => (SCW1_OUT = 16)                        | SCW1_OUT = 16                   | FTSS = 11                     | 70                              |
| 12  | (FConductivity = 11) & (FTCu = 10) => (SCW1_OUT = 16) | SCW1_OUT = 16                   | FConductivity = 11, FTCu = 10 | 70                              |
| 13  | (FCOD <sub>Cr</sub> = 8) => (SCW1_OUT = 16)           | SCW1_OUT = 16                   | FCOD <sub>Cr</sub> = 8        | 70                              |
| 14  | (FTCr = 11) & (FTNi = 11) => (SCW1_OUT = 17)          | SCW1_OUT = 17                   | FTCr = 11, FTNi = 11          | 80                              |
| 15  | (FConductivity = 7) => (SCW1_OUT = 18)                | SCW1_OUT = 18                   | FConductivity = 7             | 90                              |
| 16  | (FpH = 0) => (SCW1_OUT = 1) OR (SCW1_OUT = 12)        | SCW1_OUT = 1 ) OR SCW1_OUT = 12 | FpH = 0                       | 1 OR 30                         |

**Table S9.** SCW2 OUT Fuzzified Values Rules Optimization.

| No. | RULE                                                  | Rainfall Fuzzy Value | EMC Parameters                 | Percentile Occurrence Frequency |
|-----|-------------------------------------------------------|----------------------|--------------------------------|---------------------------------|
| 1   | (FTKN = 11) & (FTNi = 0) => (SCW2_OUT = 1)            | SCW2_OUT = 1         | FTKN = 11, FTNi = 0            | 1                               |
| 2   | (FConductivity = 25) => (SCW2_OUT = 1)                | SCW2_OUT = 1         | FConductivity = 25             | 1                               |
| 3   | (FpH = 0) & (FTurbidity = 8) => (SCW2_OUT = 1)        | SCW2_OUT = 1         | FpH = 0, FTurbidity = 8        | 1                               |
| 4   | (FTSS = 14) => (SCW2_OUT = 11)                        | SCW2_OUT = 11        | FTSS = 14                      | 20                              |
| 5   | (FTOC = 10) => (SCW2_OUT = 12)                        | SCW2_OUT = 12        | FTOC = 10                      | 30                              |
| 6   | (FTOC = 17) => (SCW2_OUT = 12)                        | SCW2_OUT = 12        | FTOC = 17                      | 30                              |
| 7   | (FConductivity = 13) & (FZn = 13) => (SCW2_OUT = 13)  | SCW2_OUT = 13        | FConductivity = 13, FZn = 13   | 40                              |
| 8   | (FNI <sub>4</sub> = 0) & (FTKN = 0) & (Pb = 11)       | SCW2_OUT = 14        | FNI <sub>4</sub> = 0, FTKN = 0 | 50                              |
| 9   | (FConductivity = 12) & (FTSS = 16) => (SCW2_OUT = 14) | SCW2_OUT = 14        | FConductivity = 12, FTSS = 16  | 50                              |
| 10  | (FTSS = 9) => (SCW2_OUT = 14)                         | SCW2_OUT = 14        | FTSS = 9                       | 50                              |
| 11  | (FO&G = 10) & (FTCu = 10) => (SCW2_OUT = 15)          | SCW2_OUT = 15        | FO&G = 10, FTCu = 10           | 60                              |
| 12  | (FConductivity = 0) & (FTP = 12) => (SCW2_OUT = 15)   | SCW2_OUT = 15        | FConductivity = 0, FTP = 12    | 60                              |
| 13  | (FTN = 9) => (SCW2_OUT = 16)                          | SCW2_OUT = 16        | FTN = 9                        | 70                              |

|    |                                                                                       |                                                      |                          |               |
|----|---------------------------------------------------------------------------------------|------------------------------------------------------|--------------------------|---------------|
| 14 | (FO&G = 3) => (SCW2_OUT = 17)                                                         | SCW2_OUT = 17                                        | FO&G = 3                 | 80            |
| 15 | (FConductivity = 4) => (SCW2_OUT = 18)                                                | SCW2_OUT = 18                                        | FConductivity = 4        | 90            |
| 16 | (FTurbidity = 0) & (FTPb = 0) => (SCW2_OUT = 1) OR (SCW2_OUT = 12) OR (SCW2_OUT = 13) | SCW2_OUT = 1 OR<br>SCW2_OUT = 12 OR<br>SCW2_OUT = 13 | FTurbidity = 0, FTPb = 0 | 1 OR 30 OR 40 |
